# Supplementary material
Source: publisher figshare collection journal article supplement (https://frontiersin.figshare.com/ndownloader/files/20322261)
Supplement: Supplementary file 1 [file 20322261]

### PART III

The figures below show the MSE (visible as the sum of the bias squared – in pink – and the estimation variance in blue) of the person-specific (PS), single and conditional (Con.) SEM for tests with varying overall reliabilities .7, .8 and .9 (x-axis), based on continuous parallel test scores. Note the difference in y-axis for the person-specific (left of the blue dashed line) compared to the single and conditional SEM.

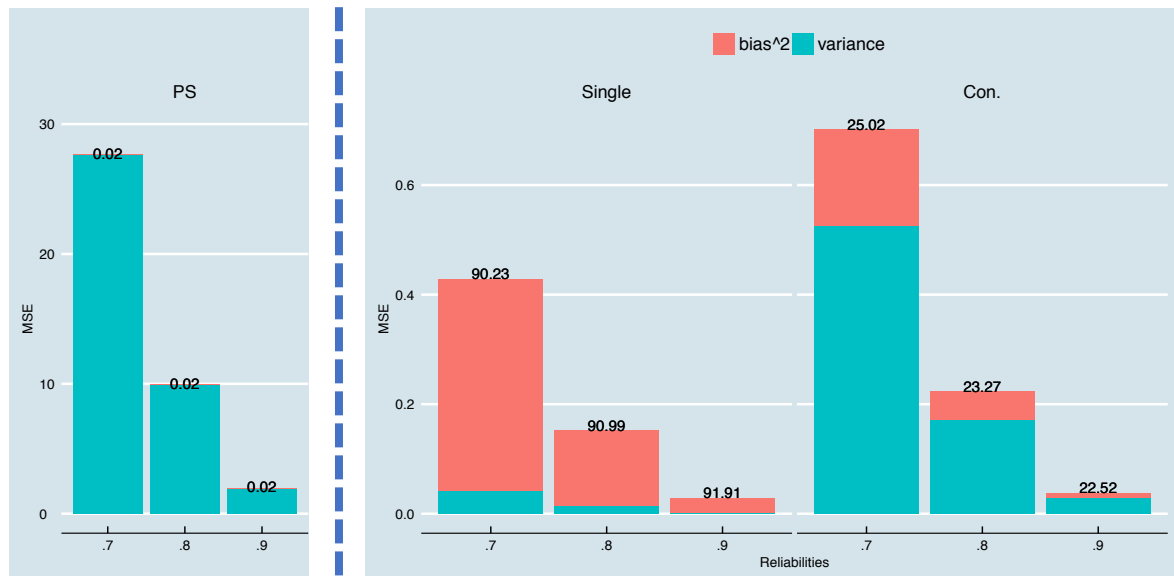

K=2

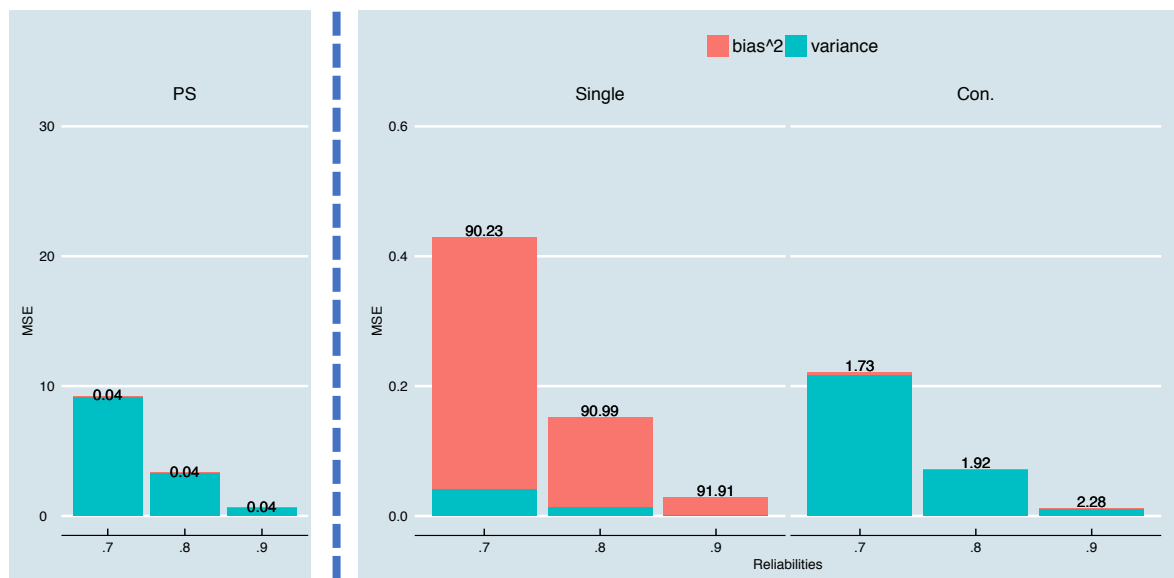

K=4

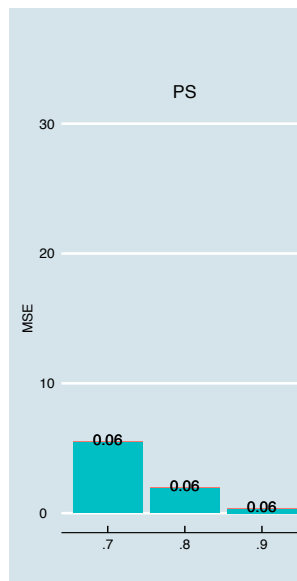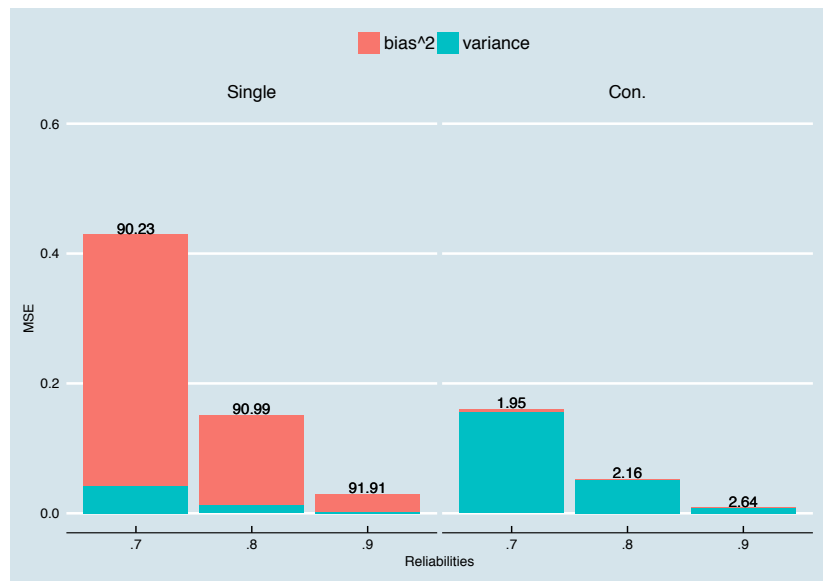

K=6
